# Supplementary material
Source: PubMed Central journal article supplement (PMC5437345)
Supplement: ismej201710x8.pdf [file ismej201710x8.pdf]

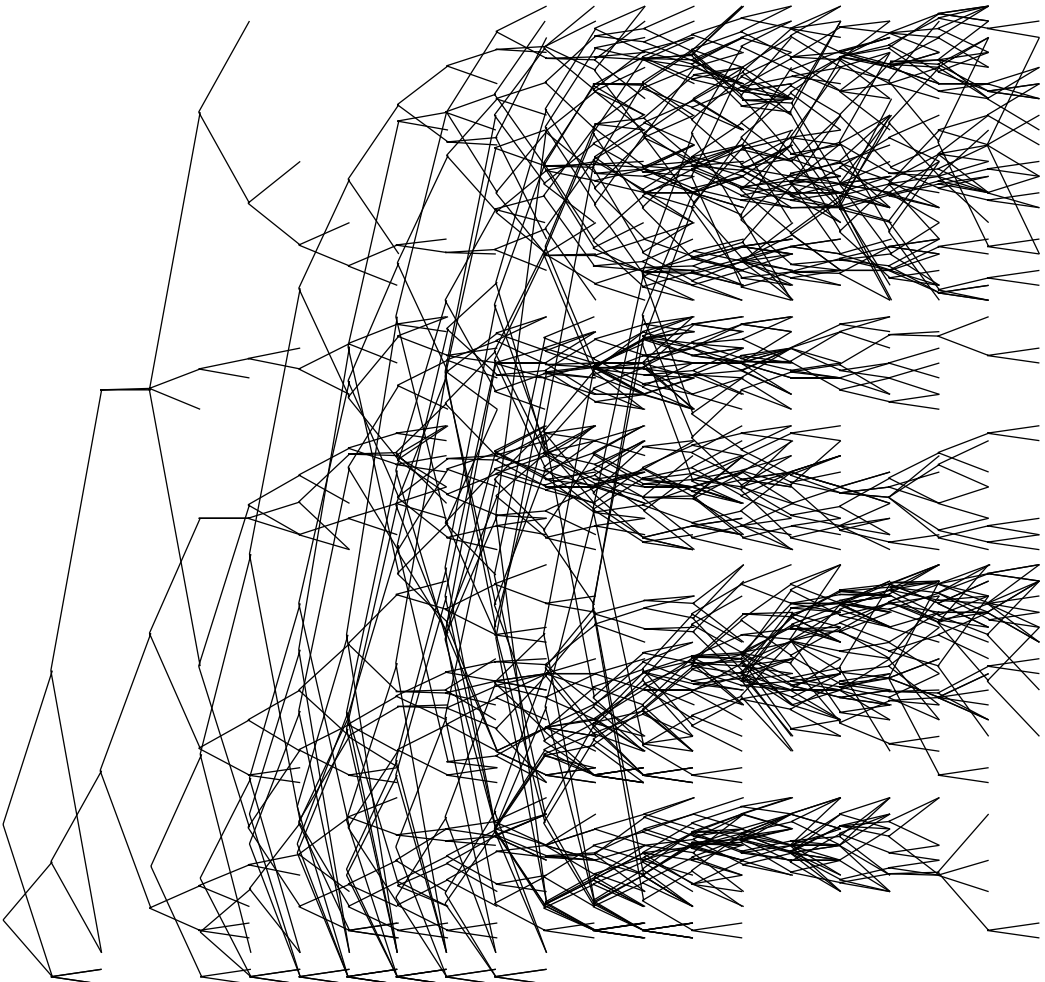

- D57
- D60
- D39
- D58
- D56
- D53
- D61
- D63
- D41
- R36
- R48
- R44
- R47
- R51
- R59
- R37
- R38
- R50
- R62
- R56
- N12
- N13
- N14
- N16
- N19
- N16
- MA27
- MA31
- MA34
- MA36
- MA35
- MA16
- MA25
- MA29
- MA18
- NC9
- NC12
- NC4
- NC8
- NC36
- NC35
- NC15
- NC14
- NC17
- NC5
- NC18
- NC1
- NC22
- MD28
- MD16
- MD27
- MD13
- MD11
- MD7
- MD25
- MD4
- MD8
- MD24

*S. elarraichensis*  
*S. velesiana*  
*S. pervernicosa*
