# Supplementary material
Source: PubMed Central journal article supplement (PMC5437345)
Supplement: ismej201710x10.pdf [file ismej201710x10.pdf]

| locality                                                                                                                                           | sample                                                       | library prep method | PCR-amplified | read length (bp) | reads       | symbiont-mapped reads                           | symbiont coverage | mitochondrial-mapped reads                           | mitochondrial coverage |
|----------------------------------------------------------------------------------------------------------------------------------------------------|--------------------------------------------------------------|---------------------|---------------|------------------|-------------|-------------------------------------------------|-------------------|------------------------------------------------------|------------------------|
| Duxbury, MA<br>(42°0'14.15"N,<br>70°40'43.79"W)                                                                                                    | MA16qill                                                     | PrepX ILM           | no            | 100              | 74,457,820  | 8,690,058                                       | 301               | 120,821                                              | 759                    |
|                                                                                                                                                    | MA18qill                                                     | PrepX ILM           | no            | 100              | 52,276,330  | 5,746,928                                       | 204               | 62,540                                               | 395                    |
|                                                                                                                                                    | MA25qill                                                     | Kappa Hyper Prep    | no            | 150              | 5,061,698   | 200,341                                         | 9                 | 7,356                                                | 68                     |
|                                                                                                                                                    | MA27qill                                                     | Kappa Hyper Prep    | no            | 150              | 1,759,230   | 102,611                                         | 5                 | 2,755                                                | 26                     |
|                                                                                                                                                    | MA29qill                                                     | custom              | no            | 150              | 1,930,672   | 171,303                                         | 9                 | 2,914                                                | 27                     |
|                                                                                                                                                    | MA31qill                                                     | custom              | no            | 150              | 2,686,844   | 276,656                                         | 14                | 5,282                                                | 49                     |
|                                                                                                                                                    | MA34qill                                                     | custom              | no            | 150              | 3,025,056   | 276,917                                         | 14                | 4,559                                                | 42                     |
|                                                                                                                                                    | MA35qill                                                     | custom              | no            | 150              | 2,349,062   | 98,469                                          | 4                 | 2,021                                                | 19                     |
| MA36qill                                                                                                                                           | custom                                                       | no                  | 150           | 2,773,226        | 185,325     | 9                                               | 3,936             | 37                                                   |                        |
| Narragansett, RI<br>(41°22'55.91"N,<br>71°30'1.10"W)                                                                                               | RI36qill                                                     | PrepX ILM           | no            | 100              | 77,457,862  | 18,525,424                                      | 667               | 117,908                                              | 740                    |
|                                                                                                                                                    | RI36testis                                                   | Kappa Hyper Prep    | no            | 150              | 1,985,024   | 0                                               | 0                 | 364                                                  | 4                      |
|                                                                                                                                                    | RI37qill                                                     | PrepX ILM           | no            | 100              | 64,333,564  | 17,559,095                                      | 635               | 107,242                                              | 672                    |
|                                                                                                                                                    | RI38qill                                                     | PrepX ILM           | no            | 100              | 72,890,886  | 22,523,992                                      | 817               | 131,762                                              | 827                    |
|                                                                                                                                                    | RI38testis                                                   | custom              | no            | 150              | 2,750,418   | 0                                               | 0                 | 426                                                  | 4                      |
|                                                                                                                                                    | RI39qill                                                     | PrepX ILM           | no            | 100              | 105,298,528 | 30,813,543                                      | 1,115             | 219,831                                              | 1,378                  |
|                                                                                                                                                    | RI41qill                                                     | custom              | yes           | 150              | 1,752,884   | 140,040                                         | 7                 | 4,174                                                | 39                     |
|                                                                                                                                                    | RI44qill                                                     | custom              | no            | 150              | 8,921,458   | 2,207,509                                       | 118               | 21,428                                               | 199                    |
|                                                                                                                                                    | RI47qill                                                     | Kappa Hyper Prep    | no            | 150              | 5,612,856   | 1,489,464                                       | 80                | 14,992                                               | 139                    |
|                                                                                                                                                    | RI48qill                                                     | custom              | no            | 150              | 4,327,898   | 530,118                                         | 27                | 10,997                                               | 103                    |
|                                                                                                                                                    | RI50qill                                                     | custom              | no            | 150              | 2,401,066   | 482,205                                         | 25                | 5,674                                                | 53                     |
|                                                                                                                                                    | RI51qill                                                     | custom              | no            | 150              | 4,327,756   | 1,117,122                                       | 60                | 7,095                                                | 66                     |
|                                                                                                                                                    | RI53qill                                                     | PrepX ILM           | no            | 100              | 45,780,752  | 11,759,954                                      | 430               | 77,125                                               | 486                    |
|                                                                                                                                                    | RI55qill                                                     | custom              | no            | 150              | 4,889,588   | 555,896                                         | 28                | 10,994                                               | 103                    |
|                                                                                                                                                    | RI56qill                                                     | custom              | no            | 150              | 4,577,454   | 653,306                                         | 34                | 9,227                                                | 86                     |
|                                                                                                                                                    | RI57qill                                                     | custom              | yes           | 150              | 1,853,644   | 280,929                                         | 15                | 4,210                                                | 39                     |
|                                                                                                                                                    | RI58qill                                                     | custom              | no            | 150              | 2,727,002   | 265,366                                         | 13                | 5,783                                                | 54                     |
|                                                                                                                                                    | RI59qill                                                     | custom              | yes           | 150              | 3,249,572   | 297,005                                         | 15                | 5,630                                                | 52                     |
| RI60qill                                                                                                                                           | custom                                                       | yes                 | 150           | 2,374,786        | 218,247     | 11                                              | 8,118             | 76                                                   |                        |
| RI61qill                                                                                                                                           | Kappa Hyper Prep                                             | no                  | 150           | 4,512,602        | 1,258,670   | 67                                              | 8,904             | 82                                                   |                        |
| RI62qill                                                                                                                                           | custom                                                       | yes                 | 150           | 3,690,768        | 1,083,510   | 58                                              | 10,317            | 96                                                   |                        |
| RI63qill                                                                                                                                           | custom                                                       | no                  | 150           | 3,871,920        | 480,379     | 25                                              | 7,790             | 73                                                   |                        |
| Shark River Island,<br>NJ (40°11'9.60"N,<br>74° 1'48.00"W)                                                                                         | NJ2qill                                                      | PrepX ILM           | no            | 100              | 67,458,582  | 13,068,989                                      | 487               | 173,116                                              | 1,092                  |
|                                                                                                                                                    | NJ3qill                                                      | PrepX ILM           | no            | 100              | 57,481,410  | 13,561,673                                      | 510               | 142,201                                              | 898                    |
|                                                                                                                                                    | NJ4qill                                                      | Kappa Hyper Prep    | no            | 150              | 4,398,148   | 1,465,200                                       | 81                | 8,896                                                | 83                     |
|                                                                                                                                                    | NJ6qill                                                      | PrepX ILM           | no            | 150              | 7,527,872   | 1,821,748                                       | 100               | 15,071                                               | 139                    |
|                                                                                                                                                    | NJ9qill                                                      | Kappa Hyper Prep    | no            | 150              | 3,578,472   | 954,394                                         | 52                | 6,532                                                | 61                     |
|                                                                                                                                                    | NJ12qill                                                     | custom              | no            | 150              | 1,454,916   | 464,608                                         | 26                | 4,217                                                | 39                     |
|                                                                                                                                                    | NJ16qill                                                     | custom              | no            | 150              | 3,161,034   | 855,982                                         | 47                | 5,745                                                | 54                     |
|                                                                                                                                                    | MD4qill                                                      | custom              | no            | 150              | 2,451,076   | 365,773                                         | 19                | 6,237                                                | 58                     |
| MD7qill                                                                                                                                            | PrepX ILM                                                    | no                  | 100           | 57,437,004       | 12,995,206  | 479                                             | 184,822           | 1,167                                                |                        |
| MD8qill                                                                                                                                            | PrepX ILM                                                    | no                  | 100           | 44,961,838       | 11,427,510  | 423                                             | 160,688           | 1,013                                                |                        |
| MD11qill                                                                                                                                           | custom                                                       | no                  | 150           | 2,548,756        | 762,417     | 41                                              | 5,281             | 49                                                   |                        |
| MD13qill                                                                                                                                           | custom                                                       | no                  | 150           | 6,338,996        | 1,384,483   | 75                                              | 20,501            | 191                                                  |                        |
| MD16qill                                                                                                                                           | custom                                                       | no                  | 150           | 2,826,318        | 981,656     | 54                                              | 8,688             | 81                                                   |                        |
| MD24qill                                                                                                                                           | custom                                                       | no                  | 150           | 2,939,968        | 673,889     | 36                                              | 9,764             | 91                                                   |                        |
| MD25qill                                                                                                                                           | custom                                                       | no                  | 150           | 1,525,038        | 379,632     | 20                                              | 3,569             | 33                                                   |                        |
| MD27qill                                                                                                                                           | Kappa Hyper Prep                                             | no                  | 150           | 5,872,178        | 1,148,384   | 61                                              | 15,259            | 142                                                  |                        |
| MD28qill                                                                                                                                           | custom                                                       | no                  | 150           | 3,949,462        | 1,177,065   | 63                                              | 15,948            | 148                                                  |                        |
| Pivers Island, NC<br>(34°42'59.23"N,<br>76°40'26.33"W)                                                                                             | NC1qill                                                      | PrepX ILM           | no            | 100              | 84,241,330  | 14,967,844                                      | 532               | 191,876                                              | 1,211                  |
|                                                                                                                                                    | NC2qill                                                      | PrepX ILM           | no            | 100              | 95,515,110  | 19,271,392                                      | 710               | 257,014                                              | 1,621                  |
|                                                                                                                                                    | NC4qill                                                      | custom              | no            | 150              | 5,048,644   | 797,587                                         | 42                | 14,474                                               | 132                    |
|                                                                                                                                                    | NC5qill                                                      | custom              | no            | 150              | 3,972,620   | 610,639                                         | 33                | 5,831                                                | 55                     |
|                                                                                                                                                    | NC8qill                                                      | custom              | no            | 150              | 4,211,310   | 809,109                                         | 44                | 9,792                                                | 92                     |
|                                                                                                                                                    | NC9qill                                                      | Kappa Hyper Prep    | no            | 150              | 6,460,028   | 1,336,389                                       | 72                | 15,031                                               | 140                    |
|                                                                                                                                                    | NC10qill                                                     | Kappa Hyper Prep    | no            | 150              | 4,484,986   | 1,017,493                                       | 55                | 7,525                                                | 70                     |
|                                                                                                                                                    | NC12qill                                                     | Kappa Hyper Prep    | no            | 150              | 124,697,640 | 20,221,843                                      | 1,081             | 197,899                                              | 1,837                  |
|                                                                                                                                                    | NC13qill                                                     | custom              | no            | 150              | 1,922,560   | 477,939                                         | 26                | 4,617                                                | 43                     |
|                                                                                                                                                    | NC14qill                                                     | Kappa Hyper Prep    | no            | 150              | 6,035,120   | 881,132                                         | 47                | 10,108                                               | 94                     |
|                                                                                                                                                    | NC15qill                                                     | custom              | yes           | 150              | 2,688,292   | 701,573                                         | 38                | 7,958                                                | 74                     |
|                                                                                                                                                    | NC16qill                                                     | custom              | no            | 150              | 5,029,430   | 985,875                                         | 53                | 8,156                                                | 76                     |
| NC17qill                                                                                                                                           | custom                                                       | no                  | 150           | 3,399,518        | 843,827     | 45                                              | 4,832             | 45                                                   |                        |
| NC18qill                                                                                                                                           | custom                                                       | no                  | 150           | 4,986,792        | 1,138,027   | 62                                              | 13,012            | 122                                                  |                        |
| NC22qill                                                                                                                                           | Kappa Hyper Prep                                             | no                  | 150           | 2,059,812        | 513,875     | 27                                              | 3,164             | 29                                                   |                        |
| Queensland, Australia<br>(27°28' 46.9986"S,<br>153°24' 6.9978"E)<br>El Arraiche field, Gulf<br>of Cadiz, Spain<br>(35°25'18.00"N,<br>6°43'58.20"W) | <i>Solemya velesiana</i>                                     | Kappa Hyper Prep    | yes           | 150              | 111,799,278 | 15,177,425/67,692,780                           | 3,820             | 79,350/90,442                                        | 823                    |
| sewage outfall<br>Santa Monica, CA                                                                                                                 | <i>Solemya elarraichensis</i><br><i>Solemya pervernicosa</i> | Kappa Hyper Prep    | yes           | 150              | 11,037,914  | 185,286/254,003                                 | 19                | 35,372/93,830                                        | 733                    |
|                                                                                                                                                    |                                                              |                     |               |                  |             | average <i>S. velum</i><br>symbiont<br>coverage | 163               | average <i>S. velum</i><br>mitochondrial<br>coverage | 282                    |
|                                                                                                                                                    |                                                              |                     |               |                  |             | median <i>S. velum</i><br>symbiont<br>coverage  | 47                | median <i>S. velum</i><br>mitochondrial<br>coverage  | 82                     |
|                                                                                                                                                    |                                                              |                     |               |                  |             | average <i>outgroup</i><br>symbiont<br>coverage | 1,323             | average <i>outgroup</i><br>mitochondrial<br>coverage | 651                    |
|                                                                                                                                                    |                                                              |                     |               |                  |             | median <i>outgroup</i><br>symbiont<br>coverage  | 130               | median <i>outgroup</i><br>mitochondrial<br>coverage  | 733                    |
