# Supplementary material
Source: PubMed Central journal article supplement (PMC5437345)
Supplement: ismej201710x14.pdf [file ismej201710x14.pdf]

|                                   |                    | subpopulation   |               |                |               |               |               |
|-----------------------------------|--------------------|-----------------|---------------|----------------|---------------|---------------|---------------|
|                                   |                    | All             | MA            | RI             | NJ            | MD            | NC            |
| Interspecific disequilibrium (ID) | $r^2$              | 0.168 +/- 0.198 | 0.126+/-0.193 | 0.0736+/-0.090 | 0.108+/-0.179 | 0.110+/-0.140 | 0.099+/-0.069 |
|                                   | total allele pairs | 1,230,491       | 43,714        | 22,626         | 575           | 16,171        | 200,301       |
|                                   | % significant      | 51.24           | 7.49          | 8.52           | 2.96          | 7.30          | 1.02          |
