# Supplementary material
Source: PubMed Central journal article supplement (PMC5437345)

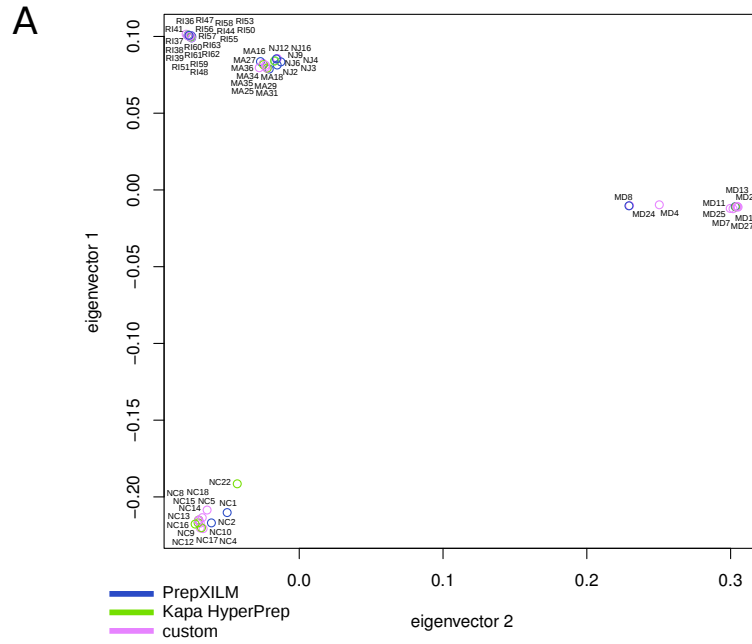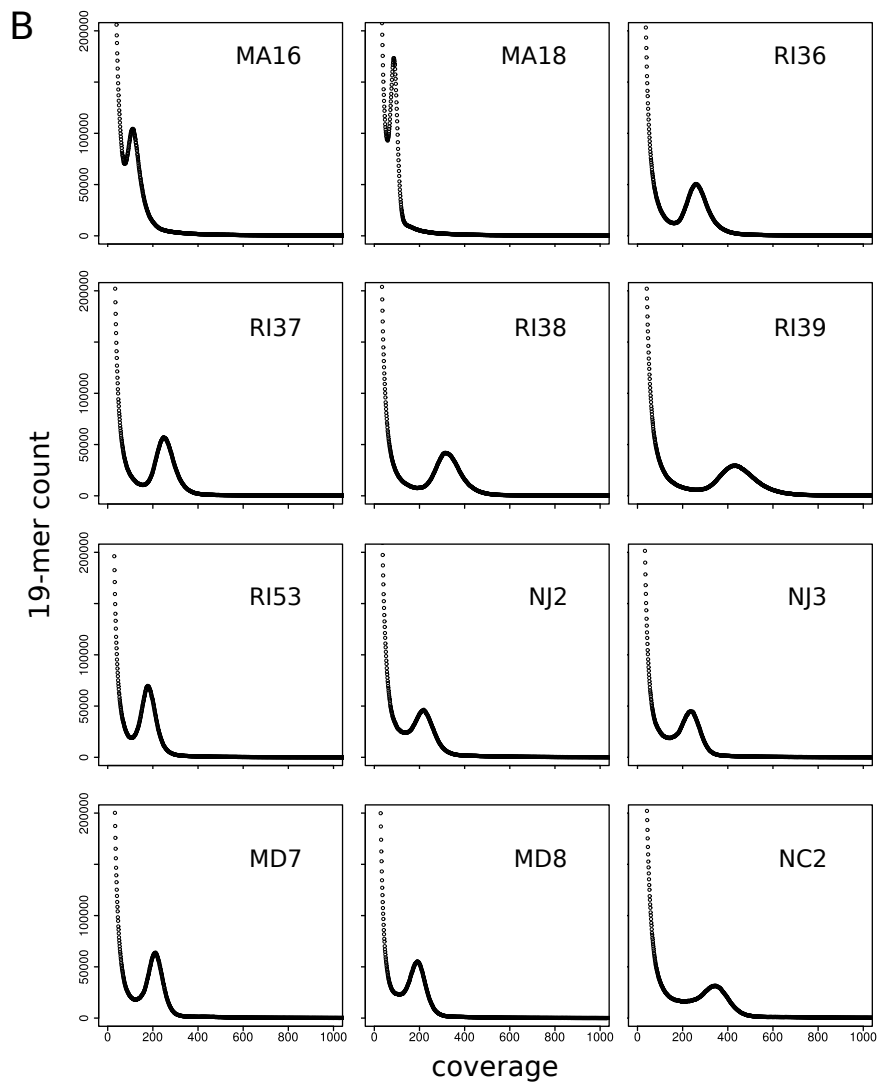

Supplement: ismej201710x4.pdf [file ismej201710x4.pdf]

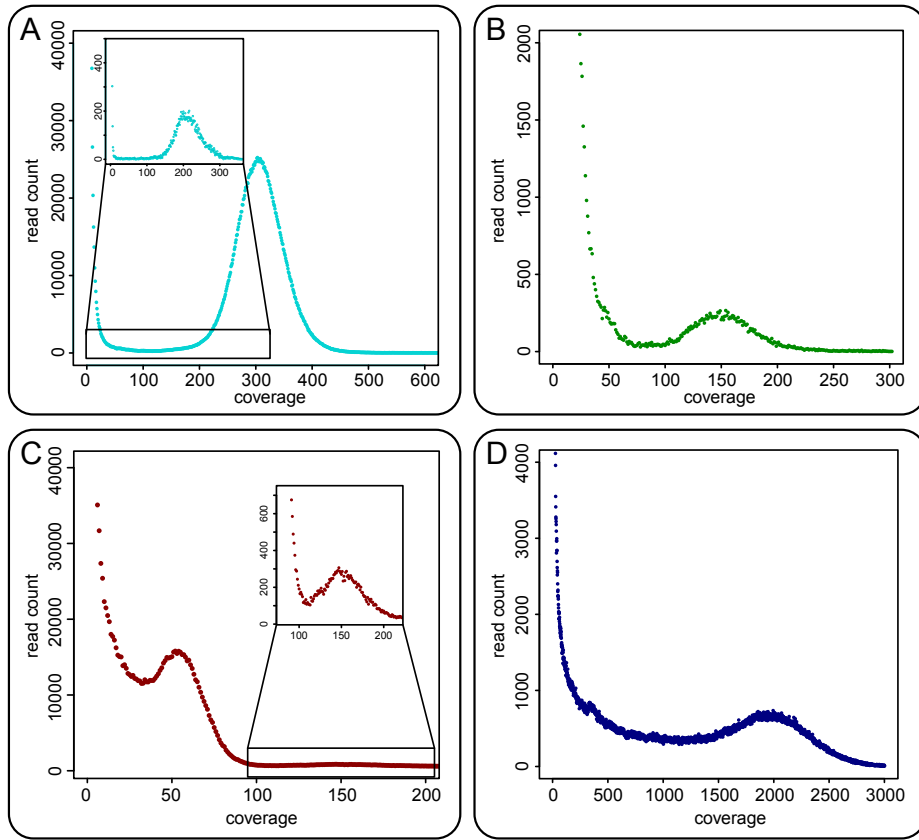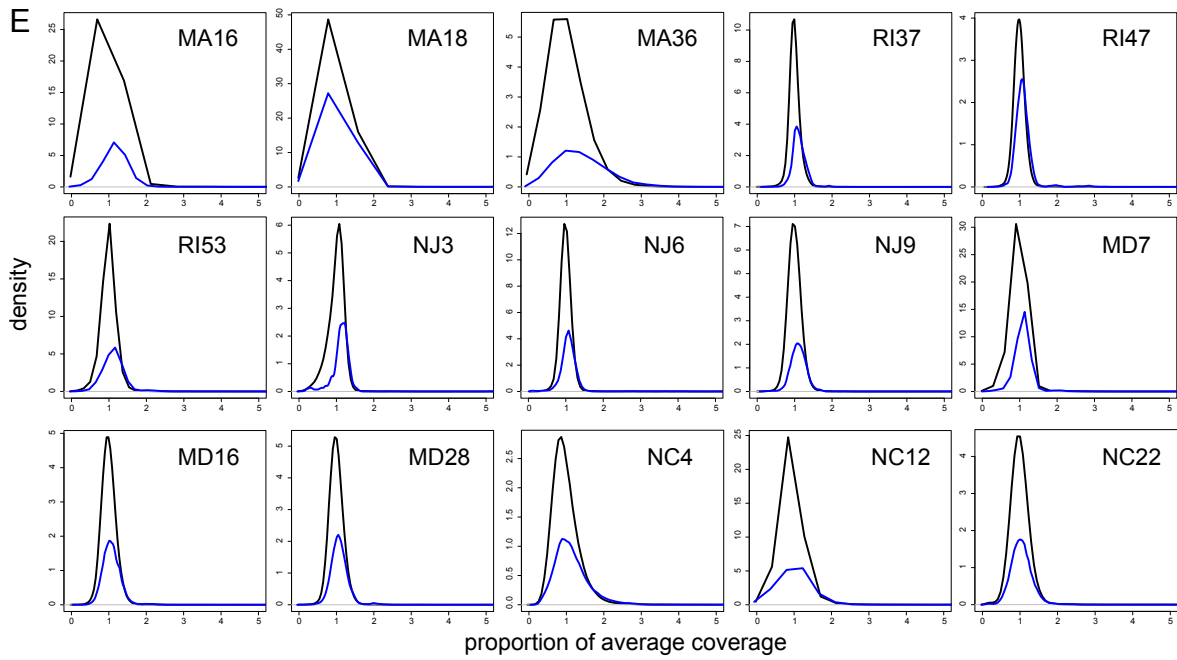

Supplement: ismej201710x5.pdf [file ismej201710x5.pdf]

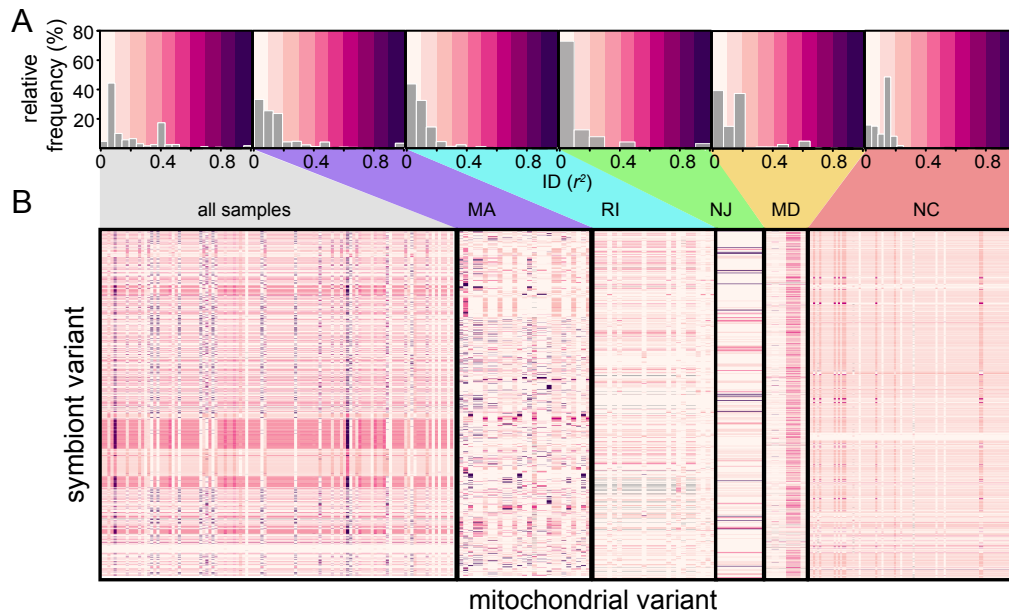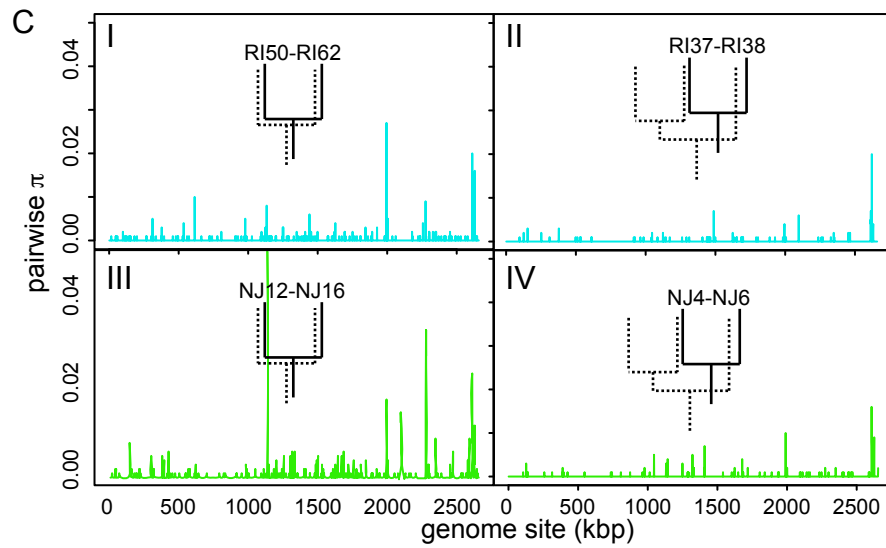

Supplement: ismej201710x6.pdf [file ismej201710x6.pdf]
